# Supplementary material for: CoP nanoparticles deposited on reduced graphene oxide sheets as an active electrocatalyst for the hydrogen evolution reaction
Source: Royal Society of Chemistry journal article supplement (doi:10.1039/c4ta06458e), 2015-01-01
Supplement: c4ta06458e1.pdf [file c4ta06458e1.pdf]

## Supporting Information

# CoP nanoparticles deposited on reduced graphene oxide sheets as an active electrocatalyst for hydrogen evolution reaction

*Lianbo Ma,<sup>a</sup> Xiaoping Shen,<sup>a\*</sup> Hu Zhou,<sup>b,c</sup> Guoxing Zhu,<sup>a</sup> Zhenyuan Ji<sup>a</sup> and Kangmin Chen<sup>b</sup>*

<sup>a</sup> *School of Chemistry and Chemical Engineering, Jiangsu University, Zhenjiang*

*212013, P. R. China*

<sup>b</sup> *School of Material Science and Engineering, Jiangsu University, Zhenjiang 212003,*

*P. R. China*

<sup>c</sup> *School of Material Science and Engineering, Jiangsu University of Science and*

*Technology, Zhenjiang 212003, P. R. China*

---

\* *Corresponding author. Tel/Fax: +86-511-88791800.*

*E-mail address: [xiaopingshen@163.com](mailto:xiaopingshen@163.com) (Xiaoping Shen).*

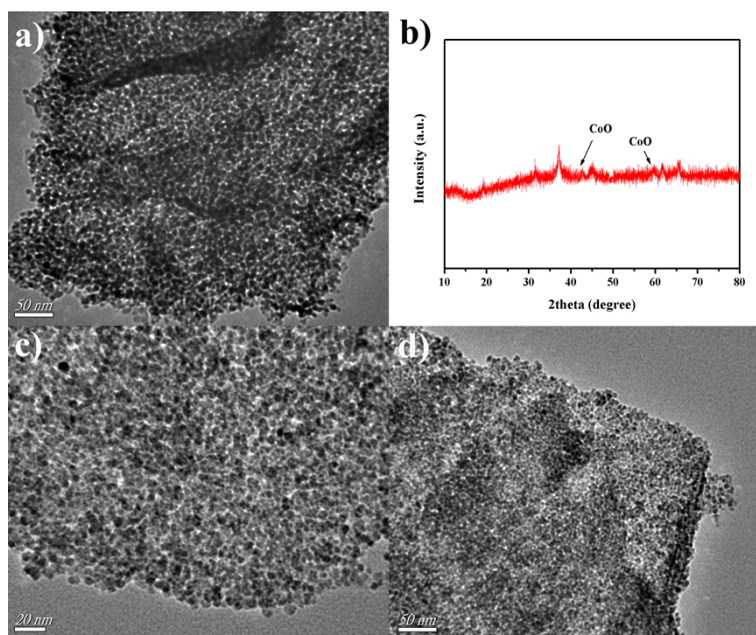

**Fig. S1.** (a) TEM image of the product synthesized with only water as the reaction solvent. (b) XRD pattern of the product synthesized with only absolute ethanol as the reaction solvent. (c) and (d) show the TEM images of the products obtained with 1.5 and 2.5 mL of water in the mixed solvent, respectively.

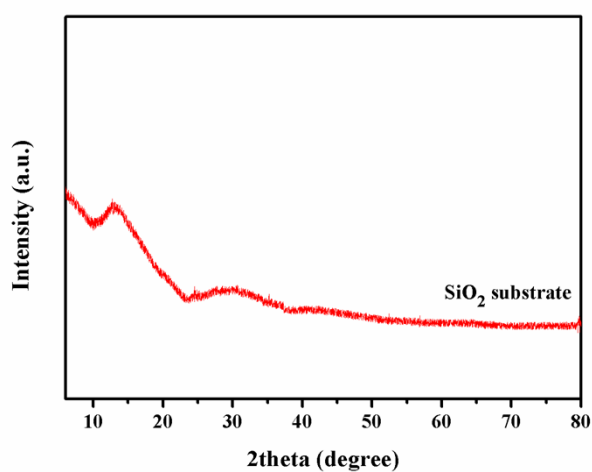

**Fig. S2.** XRD pattern of the  $\text{SiO}_2$  substrate in XRD measurements.

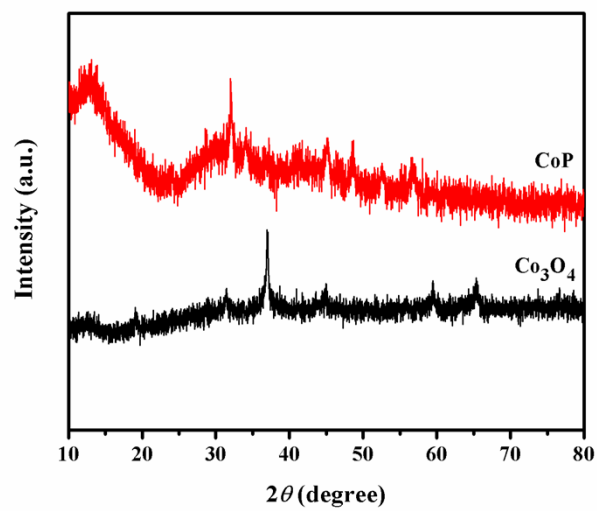

**Fig. S3.** XRD patterns of pure  $\text{Co}_3\text{O}_4$  and CoP particles.

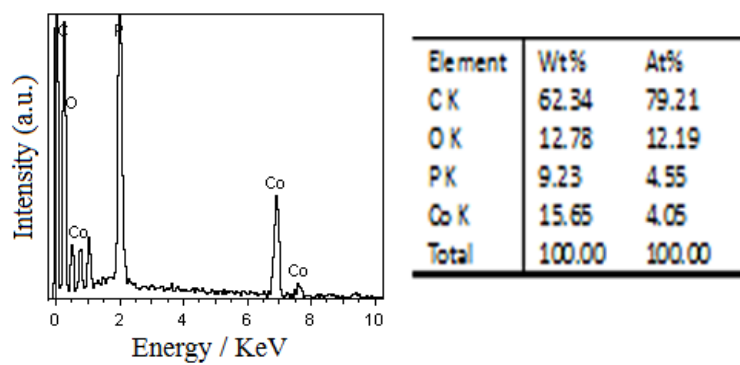

**Fig. S4.** EDS spectrum of CoP/RGO-0.36 composite.

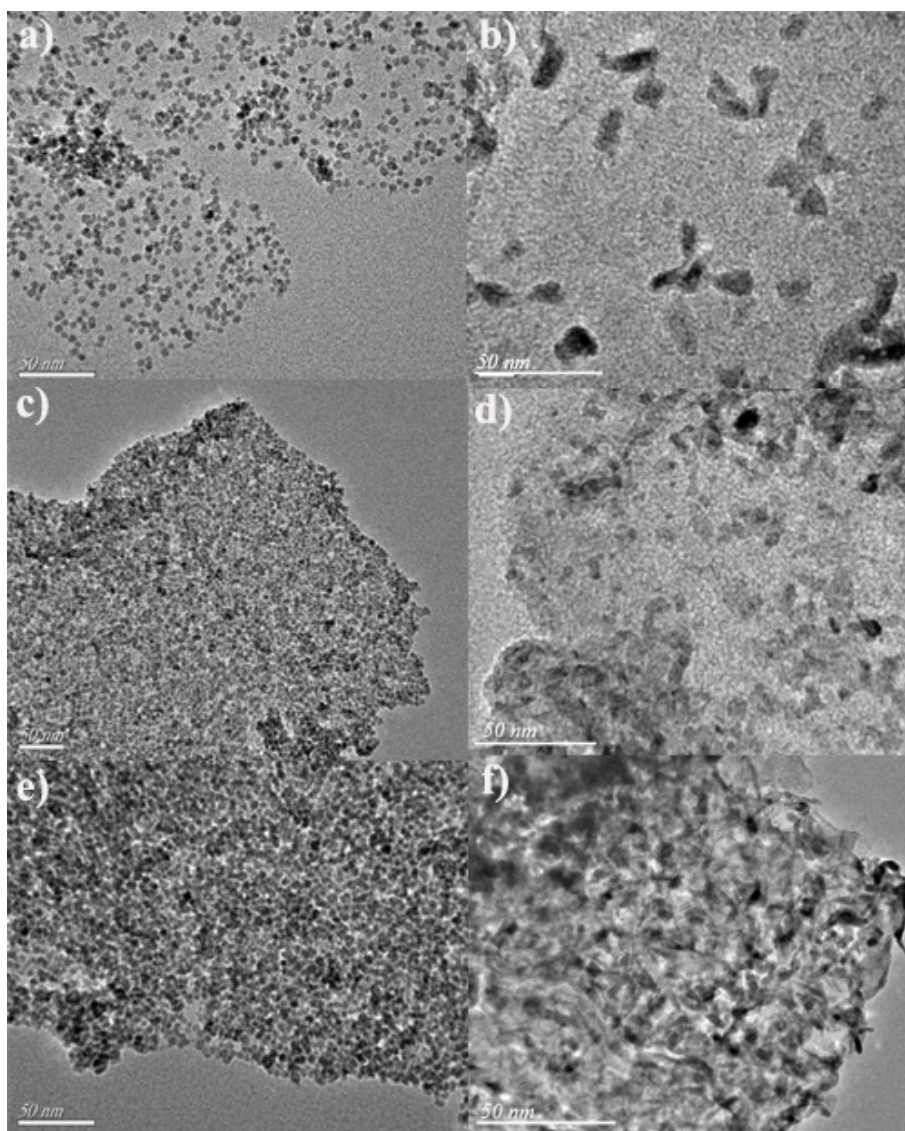

**Fig. S5.** TEM images of (a) Co<sub>3</sub>O<sub>4</sub>/RGO-0.18, (b) CoP/RGO-0.18, (c) Co<sub>3</sub>O<sub>4</sub>/RGO-0.54, (d) CoP/RGO-0.54, (e) Co<sub>3</sub>O<sub>4</sub>/RGO-0.72, and (f) CoP/RGO-0.72 composites

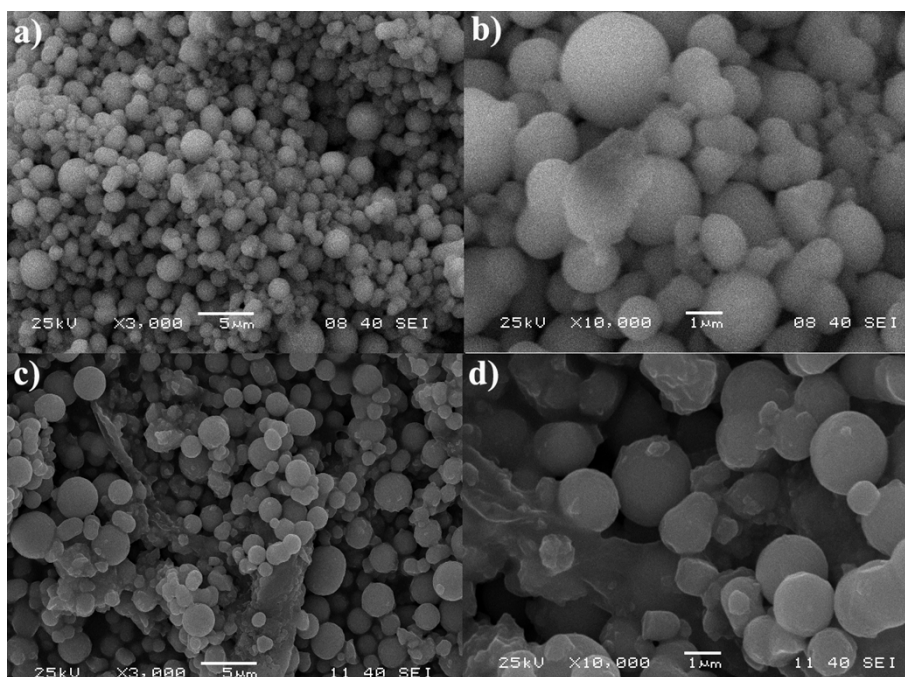

**Fig. S6.** SEM images of (a,b) pure  $\text{Co}_3\text{O}_4$  and (c,d) CoP nanoparticles.

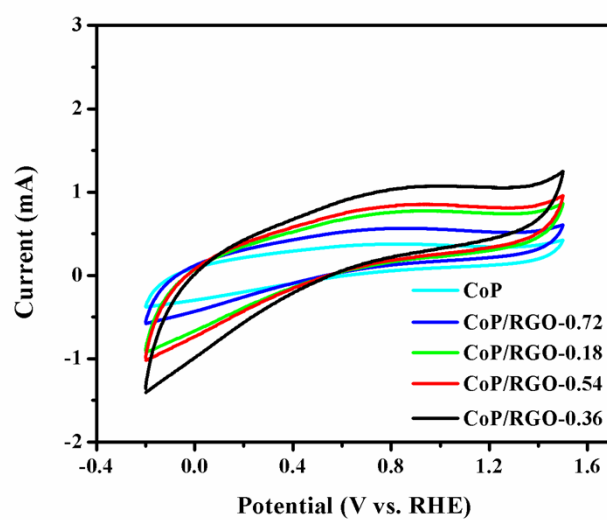

**Fig. S7.** CV plots of the CoP/RGO composites and pure CoP as electrocatalysts at the scan rate of  $40 \text{ mV s}^{-1}$ .

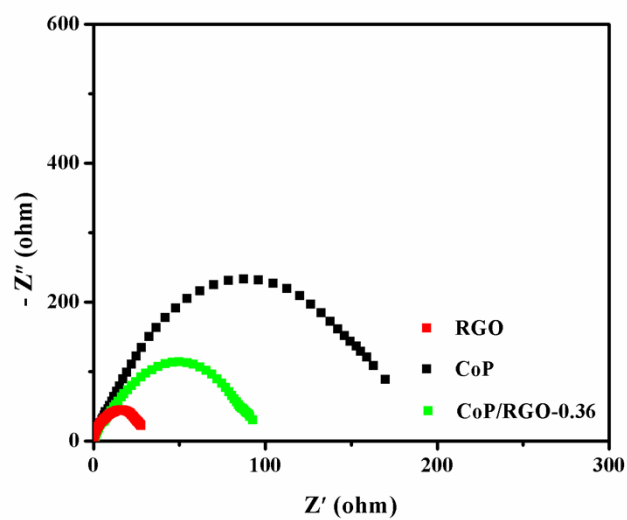

**Fig. S8.** Nyquist plots of CoP/RGO-0.36, pure CoP and RGO record at  $\eta = 40$  mV in 0.5 M  $\text{H}_2\text{SO}_4$  solution.

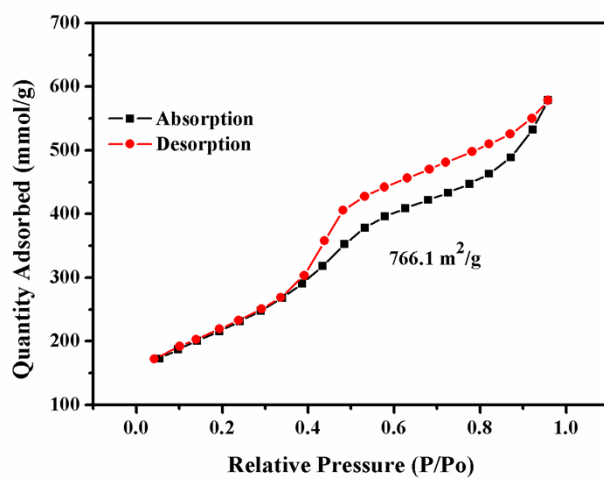

**Fig. S9.** Nitrogen adsorption and desorption isotherms of RGO.

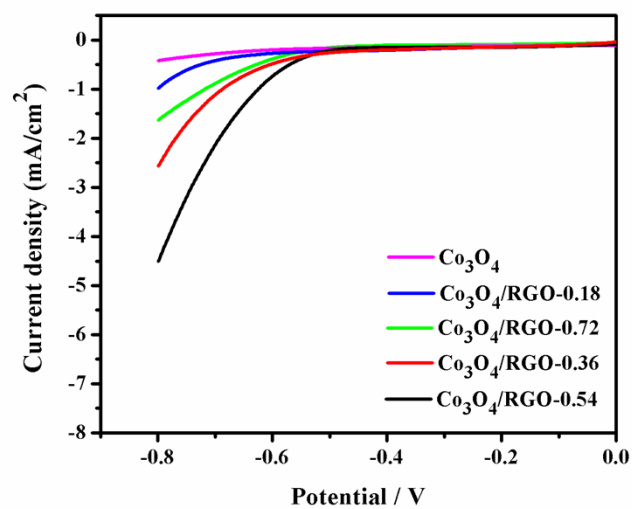

**Fig. S10.** LSV polarization curves of Co<sub>3</sub>O<sub>4</sub> and Co<sub>3</sub>O<sub>4</sub>/RGO electrodes at the scan rate of 2 mV s<sup>-1</sup> at 298 K.

**Table S1.** Kinetic parameters of pure CoP and CoP/RGO-0.36 electrodes.

| Electrode    | $T$ (K) | Tafel slope<br>(mV per decade) | Exchange current<br>density ( $A\ cm^{-2}$ ) | $E_a$ (kJ/mol) |
|--------------|---------|--------------------------------|----------------------------------------------|----------------|
| CoP          | 298     | 149.6                          | $6.3 \times 10^{-7}$                         | 82.7           |
|              | 308     | 141.4                          | $7.9 \times 10^{-6}$                         |                |
|              | 318     | 137.1                          | $1.3 \times 10^{-4}$                         |                |
|              | 328     | 131.3                          | $6.3 \times 10^{-4}$                         |                |
| CoP/RGO-0.36 | 298     | 104.8                          | $4.0 \times 10^{-5}$                         | 41.4           |
|              | 308     | 101.9                          | $1.0 \times 10^{-4}$                         |                |
|              | 318     | 95.6                           | $4.0 \times 10^{-4}$                         |                |
|              | 328     | 94.1                           | $1.3 \times 10^{-3}$                         |                |
